# Supplementary material
Source: Frontiers journal article supplement (https://www.frontiersin.org/articles/185447)
Supplement: Image_1.PDF [file Image_1.PDF]

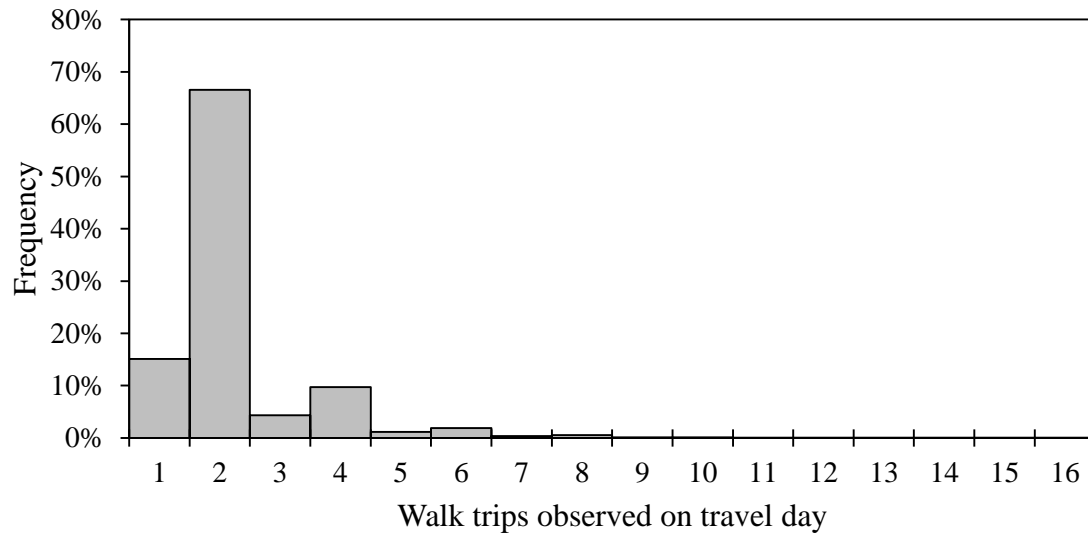

Percent zero counts, travel day walk trips: 86.0%  
 Mean: 0.32 (including zeroes); 2.27 (excluding zeroes)  
 Variance: 0.82 (including zeroes); 1.43 (excluding zeroes)

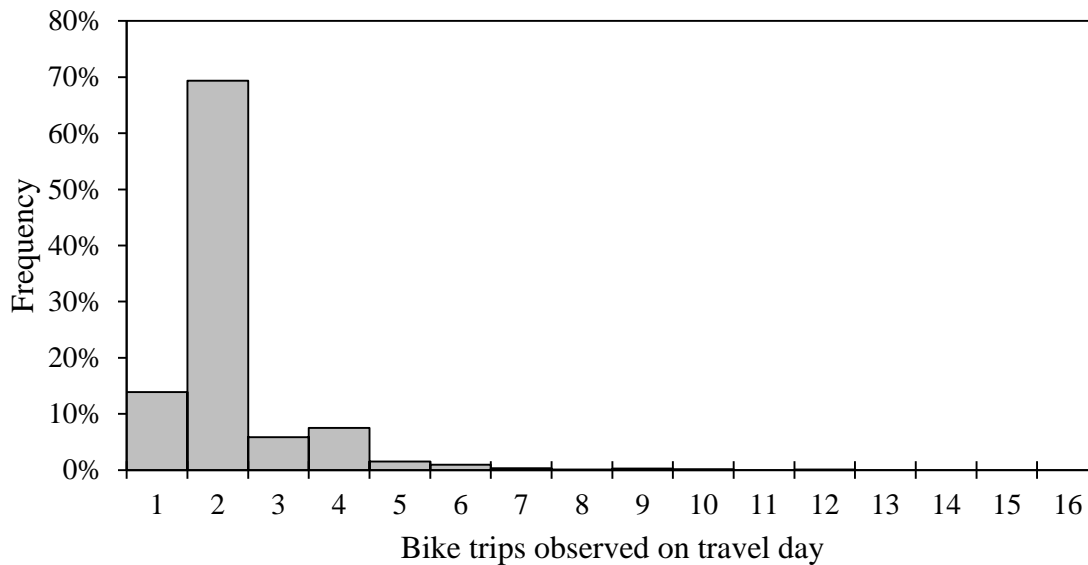

Percent zero, travel day bike trips: 98.9%  
 Mean: 0.025 (including zeroes); 2.22 (excluding zeroes)  
 Variance: 0.069 (including zeroes); 1.17 (excluding zeroes)

**Figure S1.** Distribution of non-zero trip observed walk and bike trips counts and descriptive statistics showing little evidence of overdispersion for non-zero counts
