# Supplementary material
Source: Frontiers journal article supplement (https://www.frontiersin.org/articles/185447)
Supplement: Image_3.PDF [file Image_3.PDF]

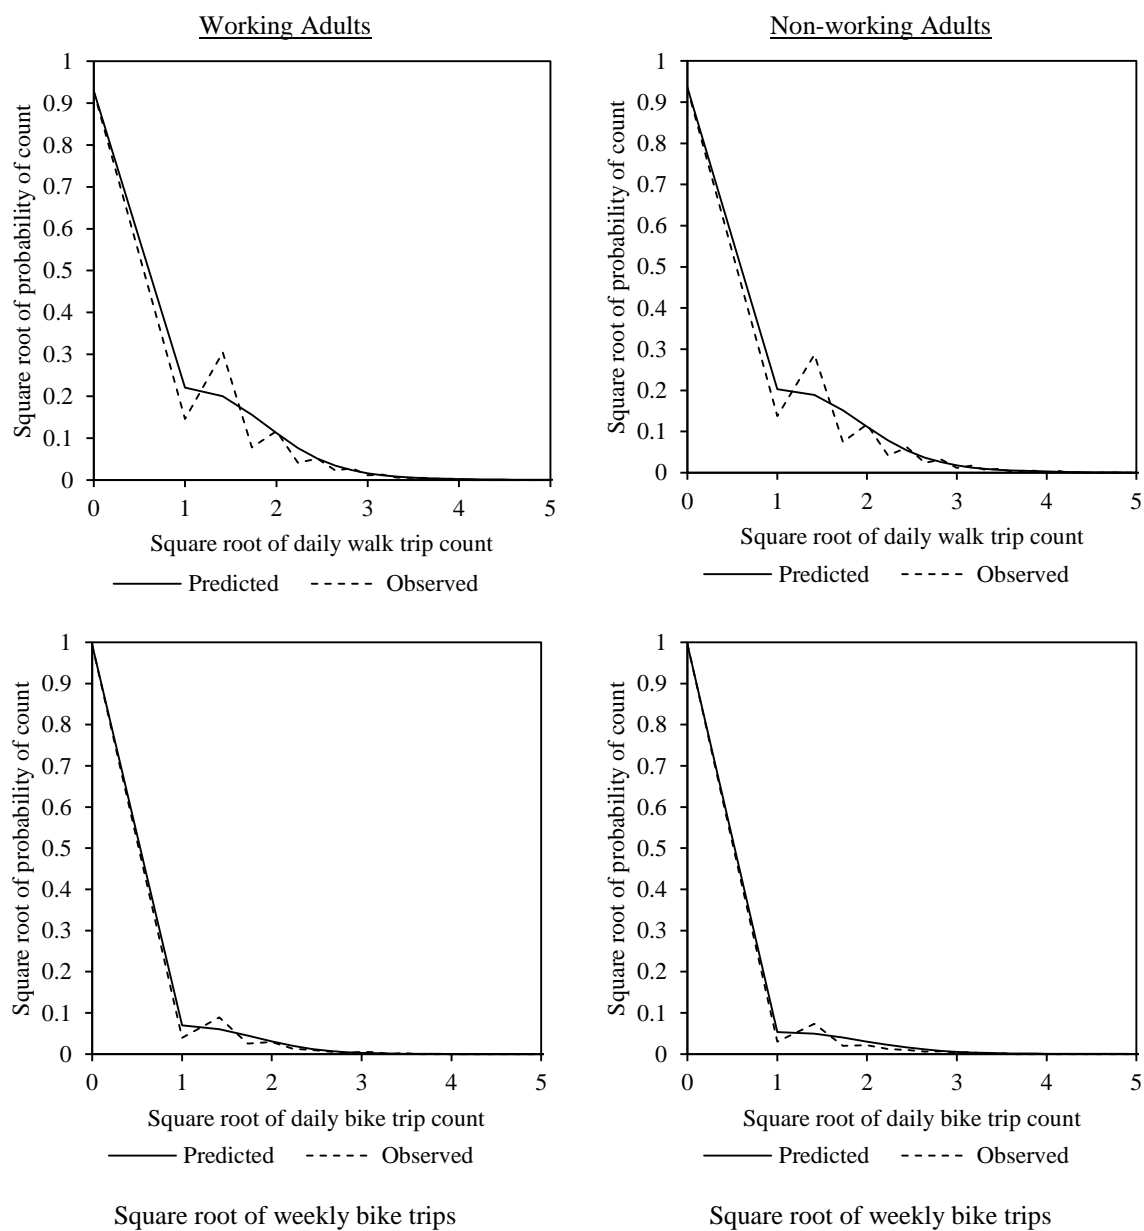

**Figure S3.** Predicted probabilities of weekly walk and bike trips. Solid black lines illustrate predicted probabilities and observed trip counts are represented by the dashed black line.
