# Supplementary material
Source: Frontiers journal article supplement (https://www.frontiersin.org/articles/185447)
Supplement: Image_5.PDF [file Image_5.PDF]

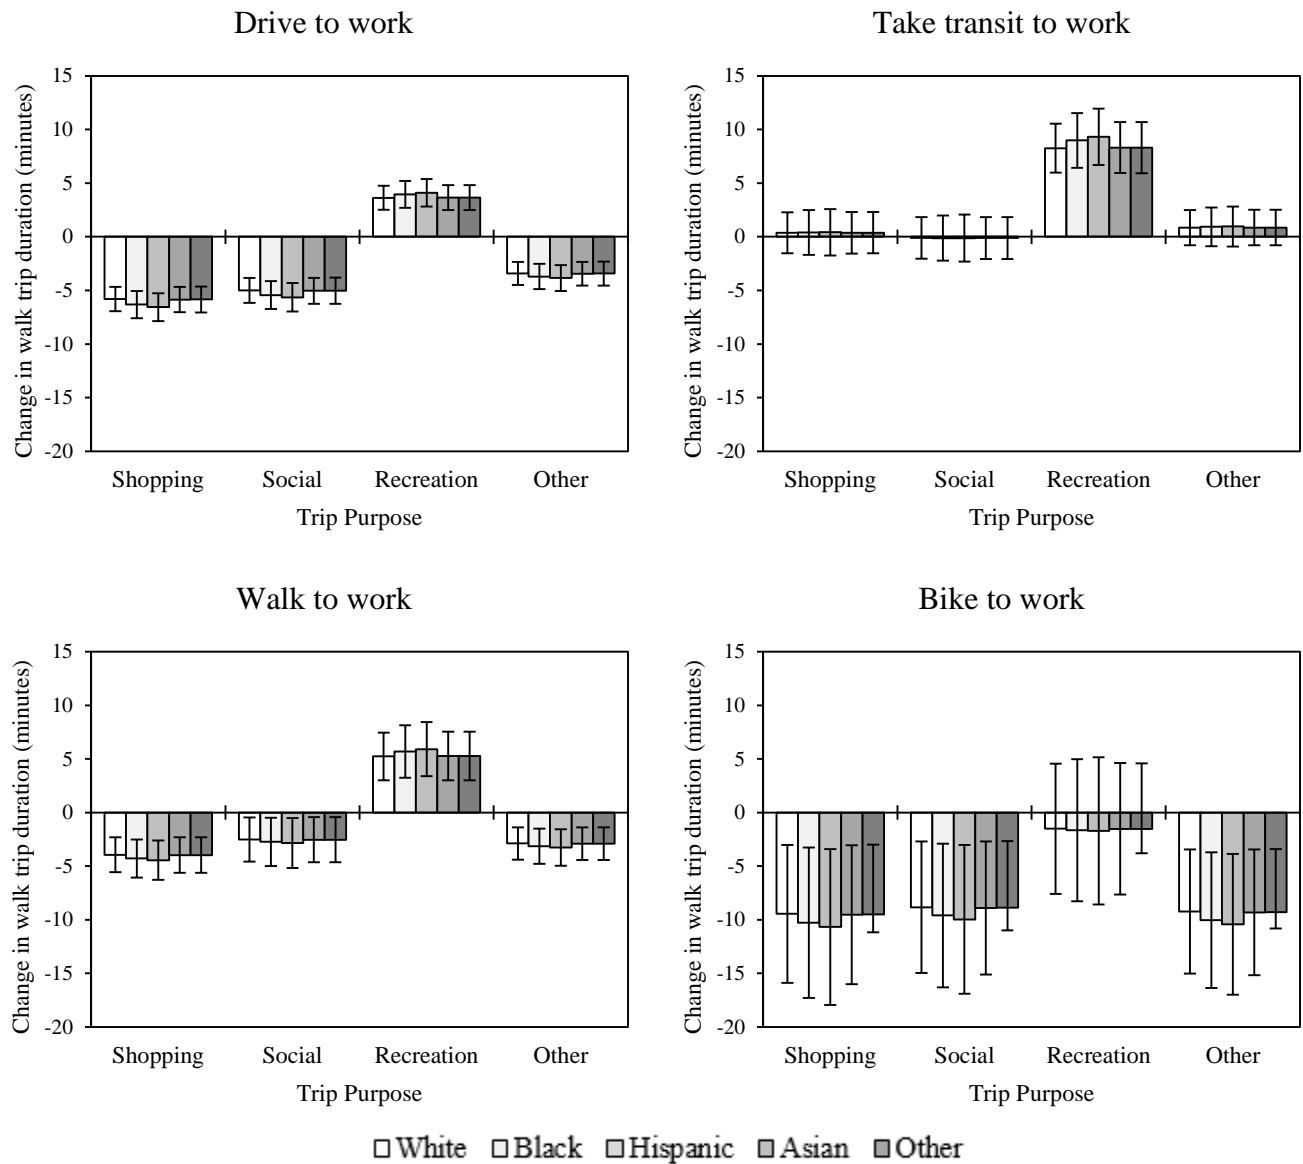

**Figure S6.** Average marginal effects of trip purpose on walk trip duration for four trip purposes (listed across the bottom axis) relative to work trip duration, by commute mode to work and race/ethnicities
