# Supplementary material
Source: Frontiers journal article supplement (https://www.frontiersin.org/articles/185447)
Supplement: Image_6.PDF [file Image_6.PDF]

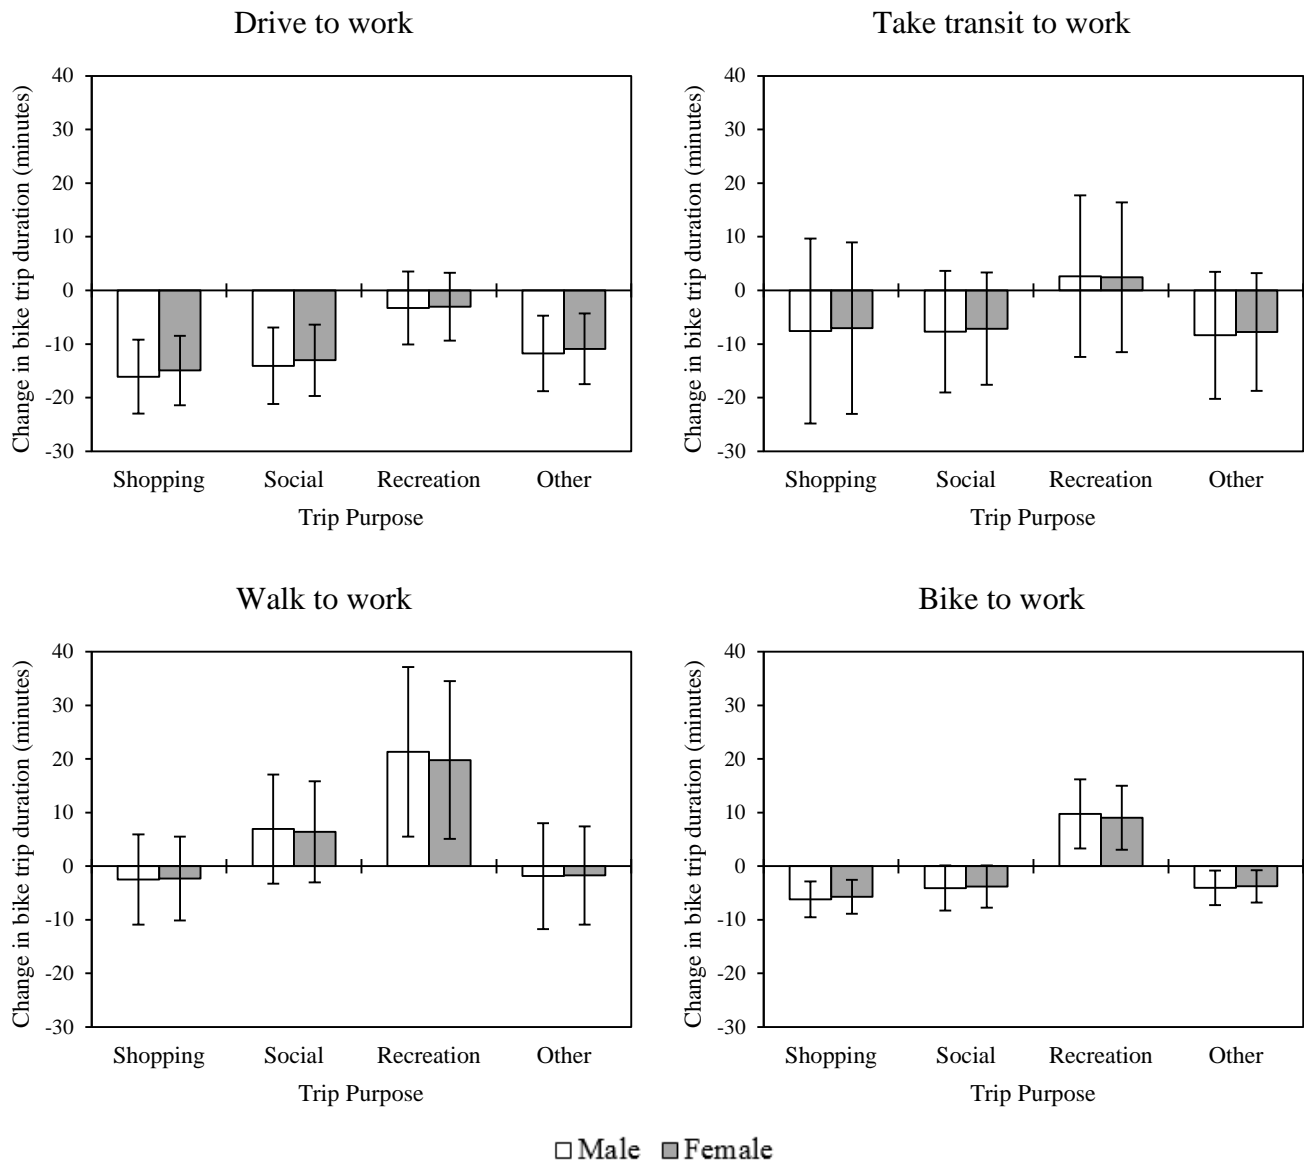

**Figure S6.** Average marginal effects of trip purpose on bike trip duration for four trip purposes (listed across the bottom axis) relative to work trip duration, by commute mode to work and sex
